# Supplementary material for: Identification of Tartary Buckwheat (Fagopyrum tataricum (L.) Gaertn) and Common Buckwheat (Fagopyrum esculentum Moench) Using Gas Chromatography–Mass Spectroscopy-Based Untargeted Metabolomics
Source: MDPI journal article supplement (doi:10.3390/foods12132578), 2023-07-01
Supplement: s1 [file s1]

Table S1. The identified differential metabolites (VIP>1) between group A vs group B. A-common buckwheat, B-Tartary buckwheat in Sichuan.

| ID      | Name_des                          | VIP         | Up.Down |
|---------|-----------------------------------|-------------|---------|
| Com_10  | Galactonic acid                   | 1.134928138 | down    |
| Com_11  | Toluenesulfonic acid              | 1.434886104 | down    |
| Com_110 | Sophorose 2                       | 1.788270983 | down    |
| Com_111 | Trehalose                         | 1.032871047 | up      |
| Com_113 | 1,5-Anhydroglucitol               | 2.351090018 | down    |
| Com_115 | Guanosine                         | 1.462715857 | down    |
| Com_116 | Creatine degr                     | 1.319896379 | up      |
| Com_118 | Proline                           | 1.627096116 | down    |
| Com_119 | 3,6-Anhydro-d-galactose 3         | 1.263292805 | down    |
| Com_123 | Ethanolamine                      | 1.263325563 | up      |
| Com_125 | Prostaglandin a2 3                | 2.82309365  | up      |
| Com_129 | Kyotorphin 2                      | 1.336597458 | down    |
| Com_130 | Glucosaminic acid 1               | 1.762822936 | down    |
| Com_132 | Lyxose 2                          | 1.518823637 | down    |
| Com_133 | Aconitic acid                     | 1.220003737 | up      |
| Com_135 | Isoleucine                        | 1.276439926 | down    |
| Com_15  | 3-(4-Hydroxyphenyl)propionic acid | 2.643329123 | up      |
| Com_152 | Serine 1                          | 1.658493224 | down    |
| Com_158 | Galactinol 1                      | 1.070717352 | up      |
| Com_160 | 9-Fluorenone 2                    | 1.205322829 | down    |
| Com_162 | Linoleic acid                     | 1.111839198 | up      |
| Com_168 | Citric acid                       | 1.52651288  | up      |
| Com_171 | Trehalose-6-phosphate             | 1.20003678  | down    |
| Com_172 | Hesperitin 3                      | 1.40413406  | up      |
| Com_183 | Piceatannol 2                     | 2.284154587 | up      |
| Com_187 | Hydroxyurea                       | 1.30044429  | down    |

|         |                                  |             |      |
|---------|----------------------------------|-------------|------|
| Com_188 | L-allothreonine 1                | 1.200646036 | down |
| Com_189 | Maltose                          | 1.217830911 | down |
| Com_193 | Aspartic acid 1                  | 1.088394593 | up   |
| Com_194 | D-erythroneolactone 2            | 4.491530251 | down |
| Com_198 | Glucose-6-phosphate 2            | 1.074083108 | up   |
| Com_2   | D-erythro-sphingosine 2          | 1.016714895 | down |
| Com_20  | Ribulose-5-phosphate 1           | 1.339118675 | down |
| Com_200 | N-methyl-L-glutamic acid 1       | 1.379942007 | up   |
| Com_201 | Galactose 2                      | 1.219396381 | up   |
| Com_206 | Alanine 1                        | 1.279803891 | down |
| Com_207 | Atrazine-2-hydroxy 4             | 1.078579767 | up   |
| Com_209 | Saccharic acid                   | 2.604537471 | down |
| Com_214 | Methionine 1                     | 1.735071307 | down |
| Com_216 | Uric acid                        | 1.468383324 | down |
| Com_217 | Epicatechin                      | 2.233971313 | up   |
| Com_220 | N-methylaniline                  | 1.143541937 | up   |
| Com_221 | 4-Hydroxy-3-methoxybenzoic acid  | 1.058907812 | down |
| Com_225 | Lactic acid                      | 3.568139432 | down |
| Com_231 | Mucic acid                       | 1.398689333 | down |
| Com_31  | Cytidine-monophosphate degr prod | 1.217240978 | up   |
| Com_44  | Oxalic acid                      | 1.00512317  | down |
| Com_50  | Threo-beta-hydroxyaspartate 1    | 1.111099764 | up   |
| Com_51  | Lysine                           | 1.060717358 | down |
| Com_55  | Ascorbate                        | 1.262097884 | up   |
| Com_61  | 3-Hydroxybutyric acid            | 1.778182573 | down |
| Com_63  | (+)-Catechin                     | 1.961823249 | up   |
| Com_65  | Methyl phosphate                 | 2.175439946 | up   |
| Com_70  | 3-Hydroxypropionic acid 1        | 1.306348689 | down |
| Com_79  | Dehydroshikimic acid 1           | 1.054504    | down |

|        |                          |             |      |
|--------|--------------------------|-------------|------|
| Com_80 | 4-Hydroxybutyrate        | 2.181218749 | down |
| Com_82 | Fucose 1                 | 1.34632362  | down |
| Com_83 | Nicotinamide             | 1.520101856 | up   |
| Com_85 | Pyruvic acid             | 2.087483519 | down |
| Com_89 | Trans,trans-muconic acid | 1.261623016 | up   |
| Com_90 | Guanidinosuccinic acid 3 | 1.163832425 | down |
| Com_93 | Succinic acid            | 1.510312356 | down |
| Com_97 | Xanthine                 | 1.431432113 | down |

Table S2. The identified differential metabolites (VIP>1) between group A vs group C. A-common buckwheat, C-Tartary buckwheat in Yunnan.

| ID      | Name_des                          | VIP         | Up.Down |
|---------|-----------------------------------|-------------|---------|
| Com_11  | Toluenesulfonic acid              | 1.154112715 | down    |
| Com_110 | Sophorose 2                       | 1.5030924   | down    |
| Com_113 | 1,5-Anhydroglucitol               | 2.55660118  | down    |
| Com_116 | Creatine degr                     | 1.524358241 | up      |
| Com_118 | Proline                           | 1.172864028 | down    |
| Com_120 | Oleic acid                        | 1.828292326 | up      |
| Com_123 | Ethanolamine                      | 2.059055742 | up      |
| Com_125 | Prostaglandin A2 3                | 3.27179634  | up      |
| Com_129 | Kyotorphin 2                      | 1.299566681 | down    |
| Com_130 | Glucosaminic acid 1               | 1.197587368 | down    |
| Com_14  | N-Acetyl-beta-D-mannosamine 4     | 1.15075927  | up      |
| Com_141 | 4-Acetylbutyric acid 2            | 1.137101167 | up      |
| Com_143 | Shikimic acid                     | 1.120717962 | down    |
| Com_15  | 3-(4-Hydroxyphenyl)propionic acid | 2.258675525 | up      |
| Com_152 | Serine 1                          | 1.360572489 | down    |
| Com_158 | Galactinol 1                      | 1.510118139 | up      |
| Com_162 | Linoleic acid                     | 1.937025214 | up      |

|         |                               |             |      |
|---------|-------------------------------|-------------|------|
| Com_165 | 1,3-Diaminopropane            | 1.12161045  | up   |
| Com_168 | Citric acid                   | 1.408479953 | up   |
| Com_171 | Trehalose-6-phosphate         | 1.215633357 | down |
| Com_172 | Hesperitin 3                  | 1.621660862 | up   |
| Com_183 | Piceatannol 2                 | 2.638671473 | up   |
| Com_189 | Maltose                       | 1.010534251 | down |
| Com_192 | Arachidic acid                | 1.152005298 | up   |
| Com_193 | Aspartic acid 1               | 1.740163176 | up   |
| Com_194 | D-erythroneolactone 2         | 4.017246248 | down |
| Com_195 | Benzylamine                   | 1.12045263  | up   |
| Com_197 | Itaconic acid                 | 1.332404611 | up   |
| Com_198 | Glucose-6-phosphate 2         | 1.311751639 | up   |
| Com_20  | Ribulose-5-phosphate 1        | 1.538219564 | down |
| Com_200 | N-Methyl-L-glutamic acid 1    | 1.270996219 | up   |
| Com_201 | Galactose 2                   | 1.604116553 | up   |
| Com_206 | Alanine 1                     | 1.163771181 | down |
| Com_207 | Atrazine-2-hydroxy 4          | 1.807306235 | up   |
| Com_209 | Saccharic acid                | 2.688828454 | down |
| Com_214 | Methionine 1                  | 1.015843381 | down |
| Com_217 | Epicatechin                   | 2.857876857 | up   |
| Com_220 | N-methylaniline               | 1.32253395  | up   |
| Com_225 | lactic acid                   | 2.906596568 | down |
| Com_230 | Gentiobiose 1                 | 1.114514439 | up   |
| Com_231 | Mucic acid                    | 1.488639784 | down |
| Com_24  | N-Acetyl-D-galactosamine 1    | 1.23504606  | up   |
| Com_30  | 5-Methoxytryptamine 2         | 1.208451341 | up   |
| Com_34  | 2,4-diaminobutyric acid 1     | 1.18698222  | up   |
| Com_50  | Threo-beta-hydroxyaspartate 1 | 1.537500053 | up   |
| Com_52  | Salicin                       | 1.159109938 | up   |

|        |                           |             |      |
|--------|---------------------------|-------------|------|
| Com_55 | Ascorbate                 | 1.457437314 | up   |
| Com_60 | 3-Hydroxynorvaline 1      | 1.329424699 | up   |
| Com_61 | 3-Hydroxybutyric acid     | 1.483762713 | down |
| Com_63 | (+)-Catechin              | 2.174593582 | up   |
| Com_65 | Methyl Phosphate          | 2.673218786 | up   |
| Com_70 | 3-Hydroxypropionic acid 1 | 1.453604877 | down |
| Com_73 | Maltitol                  | 1.313798378 | up   |
| Com_80 | 4-Hydroxybutyrate         | 2.157589383 | down |
| Com_82 | Fucose 1                  | 1.348500127 | down |
| Com_83 | Nicotinamide              | 1.75663965  | up   |
| Com_85 | Pyruvic acid              | 2.158038298 | down |
| Com_89 | trans,trans-Muconic acid  | 1.457448479 | up   |
| Com_90 | Guanidinosuccinic acid 3  | 1.330197978 | down |
| Com_93 | Succinic acid             | 1.470168758 | down |
| Com_96 | Isomaltose 1              | 1.224279483 | up   |

Table S3. The identified differential metabolites (VIP>1) between group B vs group C. B-Tartary buckwheat in Sichuan, C-Tartary buckwheat in Yunnan.

| ID      | Name_des                  | VIP         | Up.Down |
|---------|---------------------------|-------------|---------|
| Com_108 | Myo-inositol              | 1.37259832  | up      |
| Com_115 | Guanosine                 | 1.600957769 | up      |
| Com_118 | Proline                   | 1.160077357 | up      |
| Com_119 | 3,6-Anhydro-d-galactose 3 | 1.270081806 | up      |
| Com_121 | Glycine 1                 | 1.246945821 | up      |
| Com_127 | Adenine                   | 1.491408774 | up      |
| Com_130 | Glucosheptonic acid 1     | 1.404208015 | up      |
| Com_132 | Lyxose 2                  | 1.687664124 | up      |
| Com_135 | Isoleucine                | 1.107405192 | up      |
| Com_141 | 4-Acetylbutyric acid 2    | 1.364632487 | up      |

|         |                                          |             |      |
|---------|------------------------------------------|-------------|------|
| Com_146 | Phytosphingosine 2                       | 1.035434514 | up   |
| Com_164 | Phenylalanine 1                          | 1.011406996 | up   |
| Com_173 | 4-Aminobutyric acid 1                    | 1.919484903 | up   |
| Com_181 | Valine                                   | 1.132570652 | up   |
| Com_186 | 5-Aminovaleric acid lactam               | 1.950214271 | up   |
| Com_188 | L-allothreonine 1                        | 1.042464495 | up   |
| Com_19  | Stearic acid                             | 1.192944511 | up   |
| Com_191 | Glycerol                                 | 1.300521121 | up   |
| Com_192 | Arachidic acid                           | 1.697918297 | up   |
| Com_194 | D-erythroneolactone 2                    | 1.943446169 | up   |
| Com_2   | D-erythro-sphingosine 2                  | 1.762609211 | up   |
| Com_202 | Canavanine 1                             | 1.110204641 | up   |
| Com_203 | D-talose 1                               | 1.167688831 | up   |
| Com_204 | D-talose 2                               | 1.327206676 | up   |
| Com_205 | Tyrosine 1                               | 1.376271014 | up   |
| Com_214 | Methionine 1                             | 1.638754253 | up   |
| Com_225 | Lactic acid                              | 2.087175598 | up   |
| Com_23  | N-methyltryptophan                       | 1.05758331  | up   |
| Com_232 | Palmitic acid                            | 1.196873132 | up   |
| Com_30  | 5-Methoxytryptamine 2                    | 1.038157769 | up   |
| Com_37  | Ornithine                                | 1.45748559  | up   |
| Com_40  | (2r)-2-Amino-3-phosphonopropanoic acid 2 | 1.870037247 | down |
| Com_51  | Lysine                                   | 1.579184738 | up   |
| Com_56  | Uracil                                   | 1.346756597 | up   |
| Com_66  | Phenyl beta-d-glucopyranoside            | 1.552053463 | up   |
| Com_77  | Cholestane-3,5,6-triol                   | 1.714579014 | up   |
| Com_97  | Xanthine                                 | 2.19747498  | up   |

---
